# Supplementary material for: Salivary Detection of Zika Virus Infection Using ATR-FTIR Spectroscopy Coupled with Machine Learning Algorithms and Univariate Analysis: A Proof-of-Concept Animal Study
Source: MDPI journal article supplement (doi:10.3390/diagnostics13081443), 2023-04-17
Supplement: s1 [file s1]

# Salivary Detection of Zika Virus Infection Using ATR-FTIR Spectroscopy Coupled with Machine Learning Algorithms and Univariate Analysis: A Proof-of-Concept Animal Study

Stephanie Wutke Oliveira <sup>1,†</sup>, Leila Cardoso-Sousa <sup>1,†</sup>, Renata Pereira Georjutti <sup>1,2</sup>, Jacqueline Farinha Shimizu <sup>3,4</sup>, Suely Silva <sup>3,4</sup>, Douglas Carvalho Caixeta <sup>1</sup>, Marco Guevara-Vega <sup>1</sup>, Thúlio Marquez Cunha <sup>5</sup>, Murillo Guimarães Carneiro <sup>6</sup>, Luiz Ricardo Goulart <sup>7,‡</sup>, Ana Carolina Gomes Jardim <sup>3,4</sup> and Robinson Sabino-Silva <sup>1,\*</sup>

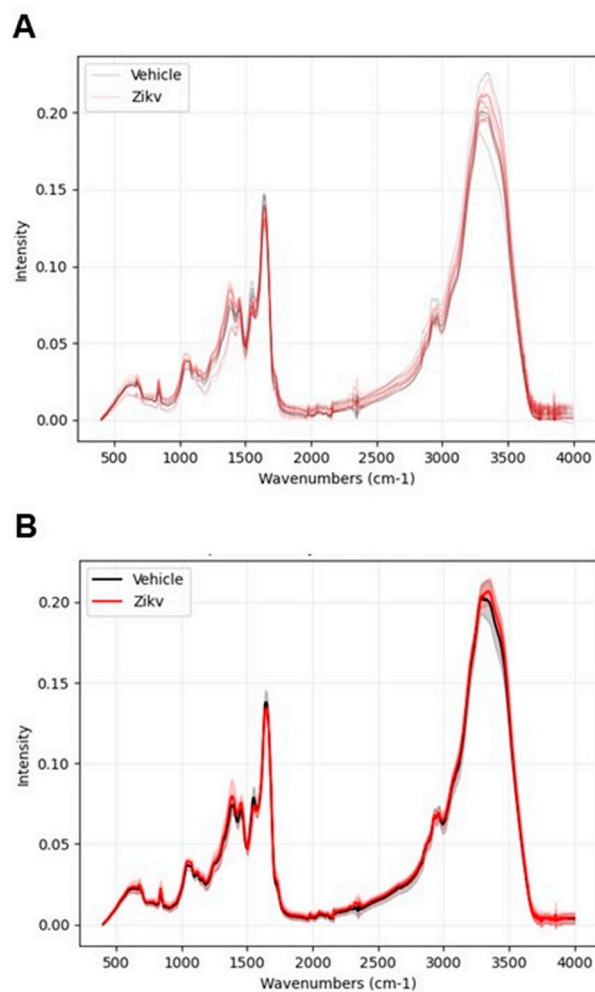

**Supporting Figure S1.** Raw data of each sample (A) and representative average with a standard deviation (B) of ATR-FTIR spectra (4000–400 cm<sup>-1</sup>) in saliva of vehicle mice and ZIKV mice.
